# Supplementary material
Source: Springer Nature journal article supplement (https://www.springermedizin.de/resource/supplementary/12889_2013_6734_MOESM2_ESM.pdf/9498974)

**Costs**

**Open defecation**

**Not  
acceptable**

**Unimproved  
Latrine**

**Improved  
Latrine**

**Flush  
Toilet**

**Health Benefits**

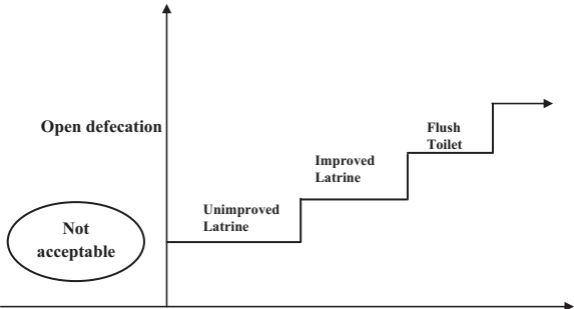

Supplement: MOESM2 [file 9498974]
